# Supplementary material for: A Semi-Quantitative Approach to Nontarget Compositional Analysis of Complex Samples
Source: PubMed Central journal article supplement (PMC11579983; doi:10.1021/acs.analchem.4c00819), 2024-11-07
Supplement: ac4c00819_si_002.pdf [file ac4c00819_si_002.pdf]

# Supporting Information

## A semi-quantitative approach for non-target compositional analysis of complex samples

Rhianna L. Evans,<sup>†</sup> Daniel J. Bryant,<sup>†</sup> Aristeidis Voliotis,<sup>‡,¶</sup> Dawei Hu,<sup>‡</sup> HuiHui  
Wu,<sup>‡</sup> Sara Aisyah Syafira,<sup>‡</sup> Osayomwanbor E. Oghama,<sup>‡</sup> Gordon McFiggans,<sup>‡</sup>  
Jacqueline F. Hamilton,<sup>\*,†,§</sup> and Andrew R. Rickard<sup>\*,†,§</sup>

<sup>†</sup>*Wolfson Atmospheric Chemistry Laboratories, Department of Chemistry, University of  
York, York, YO10 5DD, United Kingdom*

<sup>‡</sup>*Centre for Atmospheric Science, Department of Earth and Environmental Sciences, School  
of Natural Sciences, University of Manchester, Manchester, M13 9PL, United Kingdom*

<sup>¶</sup>*National Centre for Atmospheric Science, University of Manchester, Manchester, M13  
9PL, United Kingdom*

<sup>§</sup>*National Centre for Atmospheric Science, University of York, York, YO10 5DD, United  
Kingdom*

E-mail: jacqui.hamilton@york.ac.uk; andrew.rickard@york.ac.uk

# Contents

|          |                                                     |           |
|----------|-----------------------------------------------------|-----------|
| <b>1</b> | <b>Filter Extraction</b>                            | <b>S3</b> |
| <b>2</b> | <b>UHPLC-HRMS methodology</b>                       | <b>S4</b> |
| <b>3</b> | <b>Determination of matrix effects and recovery</b> | <b>S5</b> |

## List of Figures

|    |                                                                                 |    |
|----|---------------------------------------------------------------------------------|----|
| S1 | Semi-quantification workflow . . . . .                                          | S7 |
| S2 | Uncertainty of the semi-quantification methodology for quantification . . . . . | S8 |
| S3 | Comparison to an existing predictive RF model . . . . .                         | S9 |

## List of Tables

### Tables provided as .xlsx

|    |                                                                                                      |    |
|----|------------------------------------------------------------------------------------------------------|----|
| S1 | Authentic standards and retention time windows used in the semi-quantification methodology . . . . . | S2 |
| S5 | Semi-quantified CHO and CHON features . . . . .                                                      | S2 |

### Tables in this document

|    |                                                                                       |     |
|----|---------------------------------------------------------------------------------------|-----|
| S2 | MZmine 2.53 workflow . . . . .                                                        | S10 |
| S3 | MZmine 3.9.0 workflow . . . . .                                                       | S11 |
| S4 | QA/QC of the semi-quantification method . . . . .                                     | S12 |
| S6 | Differences in relative abundance between peak area and semi-quantification . . . . . | S13 |
| S7 | Average aerosol metrics determined by semi-quantification and peak area . . . . .     | S14 |

# 1 Filter Extraction

The 47 mm quartz filters from the chamber experiments were cut into 1 cm<sup>2</sup> pieces, placed in a 20 mL glass vial and 10 mL of methanol (LC-MS Optima Grade) was added. However for fresh samples, half a 47 mm filter was used due to their higher mass concentration. The resulting solution was sonicated for 45 minutes, using ice packs to lower the temperature of the water bath. The methanol extract was transferred to a second 20 mL glass vial using a 0.22  $\mu$ m syringe filter (Milipore) then dried using a Genevac vacuum solvent evaporator. The sample was reconstituted in 200  $\mu$ L 90:10 H<sub>2</sub>O (LC-MS Optima Grade): MeOH (LC-MS Optima Grade) for UHPLC-HRMS analysis.

## 2 UHPLC-HRMS methodology

Compound separation was achieved using a reversed phase C<sub>18</sub> 2.6  $\mu\text{m}$  x 2.1 mm x 10 mm Accucore column held at 40 °C. The mobile phase consisted of 0.1 % (v/v %) formic acid (Acros Organics) in water (A, LC-MS Optima Grade) and methanol (B, LC-MS Optima Grade). A gradient elution was used, starting at 90 % (A) with a 1 minute post injection hold, decreasing to 10 % (A) at 26 minutes before returning to the starting conditions at 28 minutes and a further 2 minute hold to allow for the re-equilibration of the column. The flow rate was set to 0.3 mL min<sup>-1</sup>. Prior to analysis samples were stored in an autosampler tray at 4 °C. The injection volume was set to 4  $\mu\text{L}$ , however injection volumes up to 10  $\mu\text{L}$  were used for lower concentration samples. The HESI was operated under the following conditions: a spray voltage of 4 kV, a capillary and auxiliary gas temperature of 320 °C, a sheath gas flow rate of 45 (arb.) and an auxiliary gas flow rate of 10 (arb.) Spectra were acquired in negative and positive mode using data dependent tandem mass spectrometry (ddMS<sup>2</sup>). The scan range was set to a mass-to-charge ratio ( $m/z$ ) of 85 to 750, with a mass resolution of 140,000. Tandem mass spectrometry was performed using a higher collision dissociation with a stepped normalised collision energy of 10, 20 and 45. In each scan the 10 most abundant species were selected for MS<sup>2</sup> fragmentation.

### 3 Determination of matrix effects and recovery

Using quality control recommendations by Schulze et al.<sup>1</sup> a pooled sample was taken of the wood burning samples to represent an "average" sample matrix effect. Of each sample, depending on availability a 25-75  $\mu\text{L}$  aliquot was taken and combined into a pooled sample (450  $\mu\text{L}$  in total). Due to the low sample availability the matrix effect was determined from a 4 point internal standard calibration 10  $\mu\text{L}$  aliquots of 2.5, 2.0, 1.5 and 1.0 ppm standard solutions of the 27 analytical standards in 90:10  $\text{H}_2\text{O}:\text{MeOH}$  were spiked into four 90  $\mu\text{L}$  aliquots of the pooled sample, giving a 1 in 10 dilution to produce the final calibration concentrations of 250, 200, 150 and 100 parts per billion (ppb). The same volume of stock solution was then spiked into 90 $\mu\text{L}$  of 90:10  $\text{H}_2\text{O}:\text{MeOH}$  to produce pure standard solutions at the same concentrations for comparison. Calibration curves of the pure standard solutions and the internal standard solutions were constructed. The peak area of the internal standards was determined from subtracting the pooled sample peak area from the spiked pool sample peak area. The gradient matrix effect was then determined as in Eq. S1 as the ratio of the internal standard to external standard calibration gradient for each compound (Table S4). To further understand the impact on species concentration standard addition calibration curves were constructed from the spiked pooled samples without removing the pooled sample peak area and then extrapolating the line to  $y = 0$  to determine the pooled sample concentration. This concentration was the compared to that determined from solving the external calibration regression line at the pooled sample peak area. The concentration matrix effect reported in Table S4 is expressed as the ratio of the externally calibrated concentration to the standard addition determined concentration (Eq. S2). Average matrix effects were determined from 17 internal calibrations. Only compounds with a  $R^2 \geq 0.8$  in the standard addition curve were included to reduce the impact of anomalous compounds with poor linearity. These calibrations more highly perturbed by the matrix and were predominantly compounds which eluted early ( $< 2$  minutes) as seen previously<sup>2</sup> or had low ionisation efficiencies ( $\times 10^6$ - $10^7$ ).

In the external calibrations the  $R^2$  was greater than 0.98 for 26 of the 27 identified compounds therefore the deterioration in linearity can be attributed to the matrix.

$$ME_{\text{gradient}} = \frac{\textit{Gradient}_{\text{internal}}}{\textit{Gradient}_{\text{external}}} \quad (\text{S1})$$

$$ME_{\text{concentration}} = \frac{\textit{Concentration}_{\text{external}}}{\textit{Concentration}_{\text{internal}}} \quad (\text{S2})$$

Recovery of 27 analytical standards which were identified in the wood burning samples were determined from spiking 50  $\mu\text{L}$  of a 100ppm standard solution for each standard onto a blank filter to achieve an on column concentration of 5ppm or 5  $\mu\text{g mL}^{-1}$ . The spiking procedure was repeated 3 times on 3 separate filters. Each spiked filter and a blank non-spiked filter were extracted according to the methodology described in Section "Filter Extraction". A pure 1mL stock solution of 5ppm of each analyte in 90:10  $\text{H}_2\text{O}:\text{MeOH}$  was made up and analysed by UHPLC-HRMS at the same time as the spiked filters to determine the analyte recovery shown in Table S4, calculated as the percentage of the filter peak area at 5ppm compared to the 5ppm pure standard solution.

Peak detection for the matrix effect and recovery compounds was computed using an accurate mass and retention time library in TraceFinder 4.1 with a retention time window of 30 seconds and a minimum signal-to-noise ratio of 3. For species not detected by the TraceFinder library, the peak area was manually integrated in the acquisition software XCalibur 4.3. For levulinic acid the repeatability of the recovery samples was poor therefore a single sample was taken resulting in the lack of a standard deviation value in Table S4.

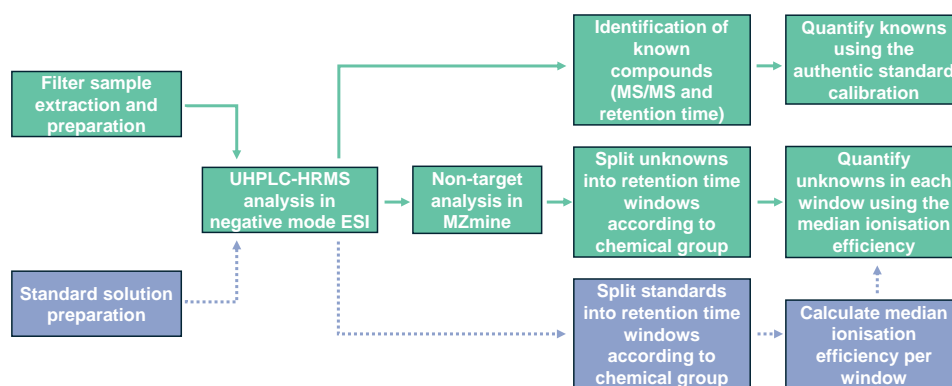

Figure S1: The semi-quantification workflow depicting the scaling of known compounds with authentic standards and unknown species via the retention time window approach.

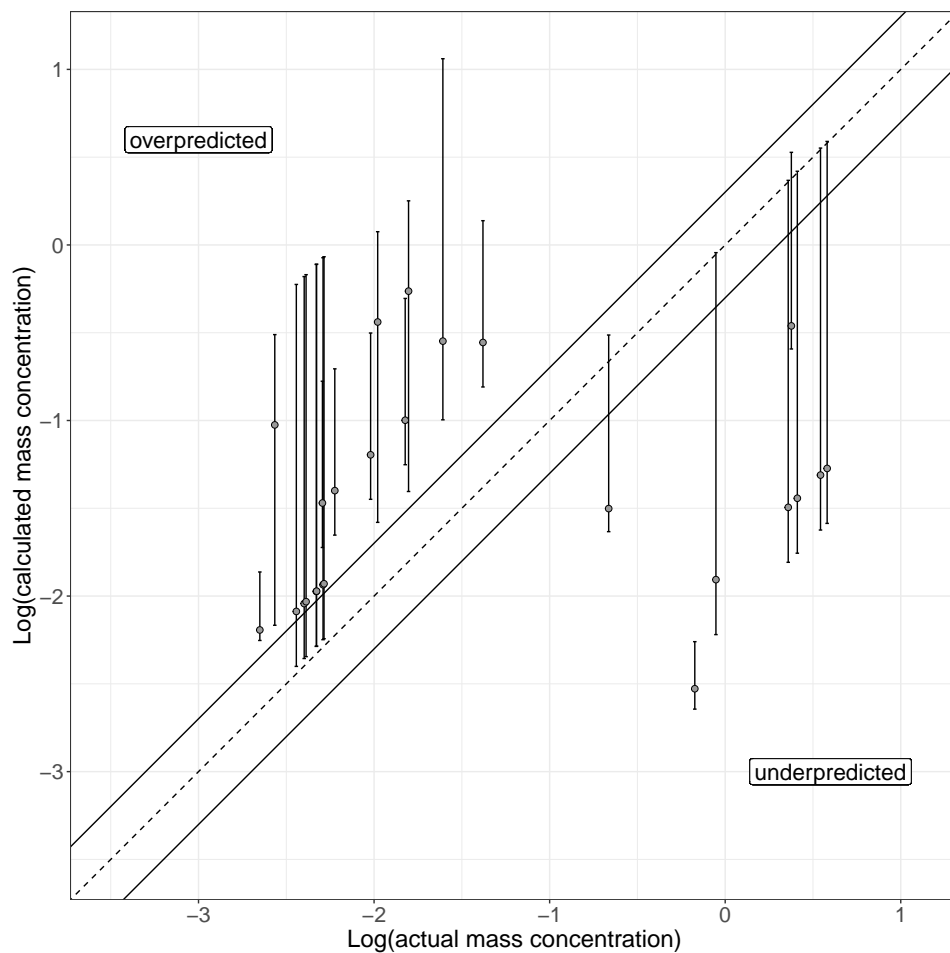

Figure S2: Comparison of the outlying compounds quantified by the semi-quantification method (y-axis) and authentic standard (x-axis) in the wood burning samples. 1:1 line is presented as a dashed line and 1:2 and 2:1 lines are indicated by the solid lines. Points represent median values and error bars depict the interquartile range calculated using the interquartile range of gradients in each retention time window.



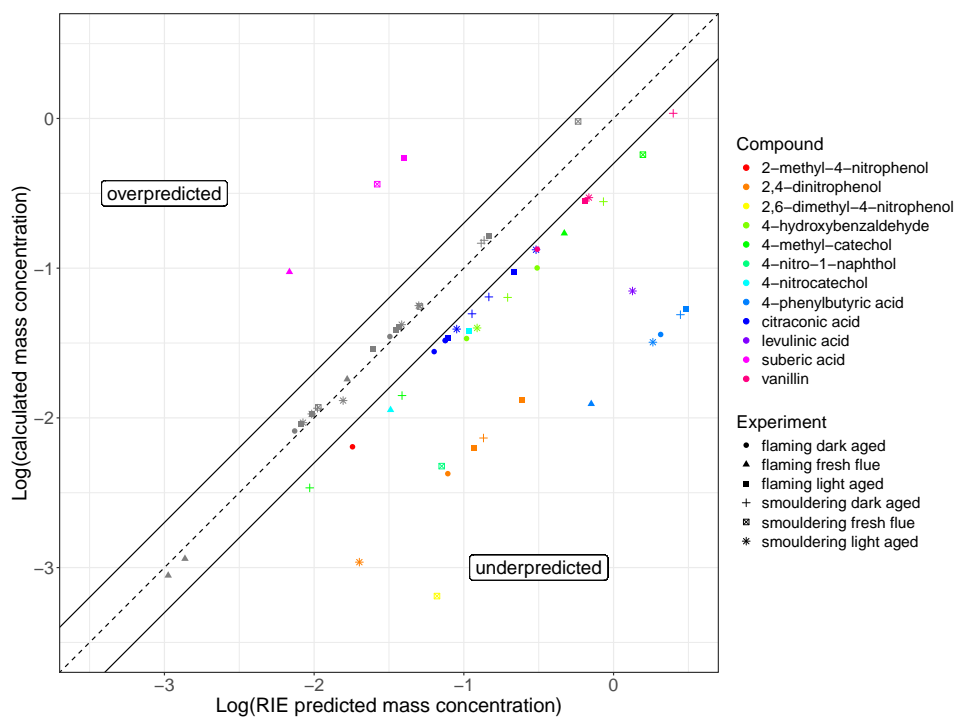

Figure S3: Comparison of the semi-quantification method (y-axis) with the RIE prediction (x-axis) for quantification of identified compounds within the wood burning aerosol samples. 1:1 line is presented as a dashed line and 1:2 and 2:1 lines are indicated by the solid lines. Compounds within this prediction range (factor of 2) are shown as grey markers with the outlying compounds presented in colour. Different wood burning samples are indicated by the marker symbol.

Table S2: Workflow used for the non-target feature detection in MZmine 2.53 and the parameters set for each module

|                            |                                                                                                                                                                                                                                                                                                                                                                          |
|----------------------------|--------------------------------------------------------------------------------------------------------------------------------------------------------------------------------------------------------------------------------------------------------------------------------------------------------------------------------------------------------------------------|
| Mass Detection             | Retention time = 0 - 20 min<br>MS Level = 1<br>Polarity = -<br>Spectrum type = profile<br>Mass detector = Exact Mass<br>Noise level = 50000                                                                                                                                                                                                                              |
| FTMS Shoulder Peaks Filter | Mass resolution = 140,000<br>Peak model function = Lorentzian                                                                                                                                                                                                                                                                                                            |
| Mass Detection             | Retention time = 0 - 20 min<br>MS Level = 2<br>Polarity = -<br>Spectrum type = profile<br>Mass detector = Exact Mass<br>Noise level = 0                                                                                                                                                                                                                                  |
| ADAP Chromatogram Builder  | Min group size in # of scans = 5<br>Group intensity threshold = 50000<br>Min highest intensity = 60000<br>$m/z$ tolerance = 0.001 $m/z$ or 3 ppm                                                                                                                                                                                                                         |
| Smoothing                  | Filter width = 7                                                                                                                                                                                                                                                                                                                                                         |
| Chromatogram Deconvolution | Algorithm = local minimum search<br>Chromatographic threshold = 80 %<br>Search minimum in RT = 0.3 min<br>Minimum relative height = 30 %<br>Minimum absolute height = 50000<br>Min ratio of peak top/edge = 1.2<br>Peak duration = 0 - 2 min<br>$m/z$ centre calculation = median<br>$m/z$ range for MS2 scan pairing = 0 Da<br>RT range for MS2 scan pairing = 0.05 min |
| Join Aligner               | $m/z$ tolerance = 0.001 $m/z$ or 3 ppm<br>Weight for $m/z$ = 3<br>RT tolerance = 0.1 min<br>Weight for RT = 1                                                                                                                                                                                                                                                            |
| Isotopic Peaks Grouper     | $m/z$ tolerance = 0.001 $m/z$ or 3 ppm<br>RT tolerance = 0.01 min<br>Monotonic shape<br>Maximum charge = 1<br>Representative isotope = most intense                                                                                                                                                                                                                      |
| Duplicate Peak Filter      | Filter mode = new average<br>$m/z$ tolerance = 0.0008 $m/z$ or 1.5 ppm<br>RT tolerance = 0.01 min                                                                                                                                                                                                                                                                        |
| Formula Prediction         | Charge = 1<br>Ionisation type = [M-H]-<br>$m/z$ tolerance = 0.001 $m/z$ or 3 ppm<br>Max best formulas per peak = 5<br>Elements = C <sub>1-40</sub> H <sub>0-100</sub> O <sub>1-10</sub> N <sub>0-4</sub> S <sub>0-2</sub> Cl <sub>0-2</sub><br>Element count heuristics Y<br>RDBE restrictions Y                                                                         |

Table S3: Workflow used for the spectral library search in MZmine 3.9.0 and the parameters set for each module

|                                 |                                                                                                                                                                                                                                                                                                                                                     |
|---------------------------------|-----------------------------------------------------------------------------------------------------------------------------------------------------------------------------------------------------------------------------------------------------------------------------------------------------------------------------------------------------|
| Mass Detection                  | Retention time = 0 - 26 min<br>MS Level = 1<br>Polarity = -<br>Spectrum type = profile<br>Mass detector = Exact Mass<br>Noise level = 50000                                                                                                                                                                                                         |
| Mass Detection                  | Retention time = 0 - 26 min<br>MS Level = 2<br>Polarity = -<br>Spectrum type = profile<br>Mass detector = Exact Mass<br>Noise level = 0                                                                                                                                                                                                             |
| ADAP Chromatogram Builder       | RT = 0 - 26min<br>MS level = 1<br>Polarity = -<br>Spectrum type = profile<br>Min group size in # of scans = 5<br>Min intensity for consecutive scans = 10000<br>Min highest intensity = 50000<br>$m/z$ tolerance = 0.0008 $m/z$ or 2 ppm                                                                                                            |
| Minimum Search Feature Resolver | Algorithm = local minimum search<br>Chromatographic threshold = 90 %<br>Minimum search range in RT = 0.3 min<br>Minimum absolute height = 50000<br>Min ratio of peak top/edge = 1.5<br>Peak duration = 0 - 2 min<br>Minimum scans = 5<br>MS/MS scan pairing = TRUE<br>MS1 to MS2 precursor tolerance = 0.01 $m/z$ or 10ppm                          |
| Isotopic Peaks Grouper          | Chemical elements = C,H,O,N,S,Cl<br>$m/z$ tolerance = 0.0005 $m/z$ or 10 ppm<br>Maximum charge = 1<br>Search in scans = single most intense                                                                                                                                                                                                         |
| Join Aligner                    | $m/z$ tolerance = 0.0008 $m/z$ or 2 ppm<br>Weight for $m/z$ = 3<br>RT tolerance = 0.1 min<br>Weight for RT = 1                                                                                                                                                                                                                                      |
| Spectral Library Search         | Scans for matching = MS level $\geq$ 2 (Merged)<br>Precursor $m/z$ tolerance = 0.001 $m/z$ or 5 ppm<br>Spectral $m/z$ tolerance = 0.0015 $m/z$ or 10 ppm<br>Minimum matched signals = 4<br>Similarity = weighted cosine similarity<br>Minimum cos similarity = 0.7<br>Handle unmatched signals = keep all and match to 0<br>RT tolerance = 0.25 min |

Table S4: QA/QC of the semi-quantification method showing the percentage analyte recovery from the filter extraction, relative standard deviation (RSD), matrix effects on the calibration slopes, matrix effect on the sample concentration and the retention time variability for the identified species in the wood burning extracts

| Compound                            | Extraction recovery / % | RSD / % | Gradient matrix effect | Concentration matrix effect | RT variability / min |
|-------------------------------------|-------------------------|---------|------------------------|-----------------------------|----------------------|
| 2,6-dihydroxybenzoic acid           | 104.4 ± 2.9             | 2.7     | -                      | -                           | -                    |
| 2,6-dimethyl-4-nitrophenol          | 75.8 ± 3.2              | 4.2     | -                      | -                           | -                    |
| 2-4-dinitrophenol                   | 80.7 ± 11.1             | 13.8    | -                      | -                           | 0.15                 |
| 2-methyl-4-nitrophenol              | 92.5 ± 12.3             | 13.3    | 0.759                  | 0.557                       | -                    |
| 3,4,5-trimethoxybenzoic acid        | 94.0 ± 4.2              | 4.4     | -                      | -                           | 0.02                 |
| 3,4-dihydroxybenzoic acid           | 91.4 ± 3.1              | 3.4     | 0.943                  | 0.927                       | -                    |
| 3,5-dimethoxy-4-hydroxybenzoic acid | 80.5 ± 2.5              | 3.0     | 0.850                  | 0.994                       | -                    |
| 3-(4-hydroxyphenyl)propionic acid   | 85.3 ± 10.2             | 11.9    | -                      | -                           | 0.12                 |
| 3-hydroxy-2-napthoic acid           | 82.5 ± 1.5              | 1.8     | 0.762                  | 0.145                       | -                    |
| 3-methyladipic acid                 | 76.2 ± 2.3              | 3.1     | 0.914                  | 1.658                       | 0.06                 |
| 4-hydroxybenzaldehyde               | 80.9 ± 0.5              | 0.7     | 0.644                  | 1.254                       | 0.09                 |
| 4-methyl-catechol                   | 62.5 ± 10.2             | 16.3    | 0.708                  | 0.770                       | 0.17                 |
| 4-nitro-1-napthol                   | 61.6 ± 4.3              | 7.0     | -                      | -                           | -                    |
| 4-nitrocatechol                     | 96.5 ± 8.4              | 8.7     | 0.449                  | 0.559                       | 0.05                 |
| 4-nitroguaiacol                     | 74.6 ± 3.2              | 4.3     | -                      | -                           | 0.10                 |
| 4-phenylbutyric acid                | 82.8 ± 7.1              | 8.5     | -                      | -                           | 0.33                 |
| adipic acid                         | 94.6 ± 1.8              | 1.9     | 0.145                  | 0.116                       | -                    |
| azelaic acid                        | 90.9 ± 5.2              | 5.8     | 0.754                  | 0.732                       | 0.17                 |
| citraconic acid                     | 97.5 ± 11.2             | 11.5    | 2.260                  | 1.870                       | 0.28                 |
| glutaric acid                       | 110.5 ± 14.6            | 13.2    | 1.410                  | 0.960                       | 0.15                 |
| hydroxycinnamic acid                | 86.4 ± 3.9              | 4.5     | 0.785                  | 0.837                       | -                    |
| levulinic acid                      | 146.8                   | -       | 0.957                  | 1.485                       | -                    |
| methylsuccinic acid                 | 97.7 ± 6.7              | 6.8     | -                      | -                           | 0.25                 |
| sebacic acid                        | 95.2 ± 2.3              | 2.4     | 0.905                  | 1.271                       | 0.14                 |
| suberic acid                        | 100.8 ± 4.0             | 4.0     | 0.660                  | 0.743                       | 0.15                 |
| succinic acid                       | 92.5 ± 4.8              | 5.2     | -                      | -                           | -                    |
| vanillin                            | 54.4 ± 6.7              | 12.3    | 0.781                  | 0.861                       | 0.22                 |

Table S6: Difference in the relative abundance (%) calculated using peak area and the semi-quantification method for each biomass burning aerosol sample

| Compound type | Sample                 | Method difference |
|---------------|------------------------|-------------------|
| CHO           | Flaming fresh flue     | -5.1              |
| CHON          | Flaming fresh flue     | 2.5               |
| CHO           | Flaming dark aged      | -28.5             |
| CHON          | Flaming dark aged      | 17.9              |
| CHO           | Flaming light aged     | -31.2             |
| CHON          | Flaming light aged     | 22.9              |
| CHO           | Smouldering fresh flue | -10.7             |
| CHON          | Smouldering fresh flue | 7.6               |
| CHO           | Smouldering dark aged  | -19.3             |
| CHON          | Smouldering dark aged  | 5.9               |
| CHO           | Smouldering light aged | -21.0             |
| CHON          | Smouldering light aged | 9.9               |

Table S7: Comparison of the semi-quantification method and peak area to determine average metrics commonly used in the non-target analysis of organic aerosol, including, oxygen:carbon ratio, hydrogen:carbon ratio, molecular formula and relative abundance to total mass.

| Sample type            | Category | Semi-quantification |      |                                                                       |                        | Peak area |      |                                                                       |                        |
|------------------------|----------|---------------------|------|-----------------------------------------------------------------------|------------------------|-----------|------|-----------------------------------------------------------------------|------------------------|
|                        |          | O:C                 | H:C  | Formula                                                               | Relative abundance / % | O:C       | H:C  | Formula                                                               | Relative abundance / % |
| Flaming fresh flue     | CHO      | 0.28                | 1.05 | C <sub>12.8</sub> H <sub>13.0</sub> O <sub>3.3</sub>                  | 96.4                   | 0.33      | 1.09 | C <sub>11.4</sub> H <sub>11.9</sub> O <sub>3.3</sub>                  | 91.3                   |
| Flaming dark aged      | CHO      | 0.38                | 1.33 | C <sub>10.4</sub> H <sub>13.8</sub> O <sub>3.5</sub>                  | 77.8                   | 0.47      | 1.34 | C <sub>8.5</sub> H <sub>11.1</sub> O <sub>3.5</sub>                   | 49.3                   |
| Flaming light aged     | CHO      | 0.42                | 1.39 | C <sub>10.1</sub> H <sub>14.6</sub> O <sub>3.8</sub>                  | 87.0                   | 0.47      | 1.31 | C <sub>8.7</sub> H <sub>11.6</sub> O <sub>3.9</sub>                   | 55.9                   |
| Smouldering fresh flue | CHO      | 0.35                | 1.04 | C <sub>10.6</sub> H <sub>10.4</sub> O <sub>3.3</sub>                  | 94.9                   | 0.40      | 1.09 | C <sub>9.6</sub> H <sub>10.0</sub> O <sub>3.5</sub>                   | 84.2                   |
| Smouldering dark aged  | CHO      | 0.45                | 1.45 | C <sub>9.4</sub> H <sub>13.0</sub> O <sub>3.6</sub>                   | 83.0                   | 0.50      | 1.44 | C <sub>8.4</sub> H <sub>11.5</sub> O <sub>3.7</sub>                   | 63.7                   |
| Smouldering light aged | CHO      | 0.49                | 1.63 | C <sub>9.4</sub> H <sub>15.4</sub> O <sub>3.9</sub>                   | 89.3                   | 0.53      | 1.53 | C <sub>8.1</sub> H <sub>12.3</sub> O <sub>3.8</sub>                   | 71.9                   |
| Flaming fresh flue     | CHON     | 0.54                | 1.74 | C <sub>13.5</sub> H <sub>23.1</sub> O <sub>5.2</sub> N <sub>1.6</sub> | 3.2                    | 0.47      | 1.44 | C <sub>11.5</sub> H <sub>17.6</sub> O <sub>4.6</sub> N <sub>1.2</sub> | 5.7                    |
| Flaming dark aged      | CHON     | 0.32                | 1.43 | C <sub>14.6</sub> H <sub>23.2</sub> O <sub>4.2</sub> N <sub>1.4</sub> | 17.7                   | 0.42      | 1.36 | C <sub>10.9</sub> H <sub>16.6</sub> O <sub>4.0</sub> N <sub>1.3</sub> | 35.6                   |
| Flaming light aged     | CHON     | 0.41                | 1.25 | C <sub>11.2</sub> H <sub>14.5</sub> O <sub>4.3</sub> N <sub>1.5</sub> | 8.2                    | 0.47      | 1.03 | C <sub>8.7</sub> H <sub>9.5</sub> O <sub>3.7</sub> N <sub>1.3</sub>   | 32.1                   |
| Smouldering fresh flue | CHON     | 0.42                | 1.18 | C <sub>10.4</sub> H <sub>12.3</sub> O <sub>3.7</sub> N <sub>1.3</sub> | 4.6                    | 0.47      | 1.05 | C <sub>8.8</sub> H <sub>9.4</sub> O <sub>3.8</sub> N <sub>1.1</sub>   | 12.1                   |
| Smouldering dark aged  | CHON     | 0.35                | 1.35 | C <sub>13.7</sub> H <sub>18.6</sub> O <sub>3.8</sub> N <sub>2.1</sub> | 9.9                    | 0.39      | 1.30 | C <sub>11.3</sub> H <sub>15.6</sub> O <sub>3.8</sub> N <sub>1.5</sub> | 15.8                   |
| Smouldering light aged | CHON     | 0.46                | 1.39 | C <sub>11.1</sub> H <sub>15.9</sub> O <sub>4.7</sub> N <sub>1.7</sub> | 5.7                    | 0.51      | 1.24 | C <sub>9.1</sub> H <sub>12.0</sub> O <sub>4.1</sub> N <sub>1.4</sub>  | 15.6                   |

## References

- (1) Schulze, B.; Jeon, Y.; Kaserzon, S.; Heffernan, A. L.; Dewapriya, P.; O'Brien, J.; Ramos, M. J. G.; Gorji, S. G.; Mueller, J. F.; Thomas, K. V.; Samanipour, S. An assessment of quality assurance/quality control efforts in high resolution mass spectrometry non-target workflows for analysis of environmental samples. *TrAC, Trends Anal. Chem.* **2020**, *133*, 116063.
- (2) Williams, M. L.; Olomukoro, A. A.; Emmons, R. V.; Godage, N. H.; Gionfriddo, E. Matrix effects demystified: Strategies for resolving challenges in analytical separations of complex samples. *J. Sep. Sci.* **2023**, *46*, 2300571.
